# Supplementary material for: Reduction of endoplasmic reticulum stress inhibits neointima formation after vascular injury
Source: PubMed Central journal article supplement (PMC4221790; doi:10.1038/srep06943), 2014-11-06
Supplement: srep06943-s1.pdf [file srep06943-s1.pdf]

***Supplementary information***

**Reduction of endoplasmic reticulum stress inhibits neointima formation after vascular injury**

Shutaro Ishimura\*, Masato Furuhashi\*, Tomohiro Mita, Takahiro Fuseya, Yuki Watanabe, Kyoko Hoshina, Nobuaki Kokubu, Katsumi Inoue, Hideaki Yoshida, Tetsuji Miura

*\*The first two authors equally contributed to this work.*

Figure S1

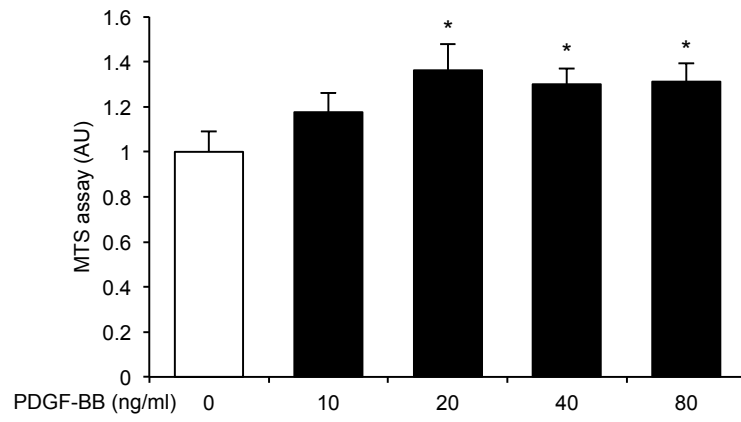

**Figure S1. Dose dependent effect of PDGF-BB on cell proliferation in CASMC.** Cell proliferation was assessed by an MTS assay in CASMC treated with 0-80 ng/ml PDGF-BB. \*P < 0.05.

## Figure S2

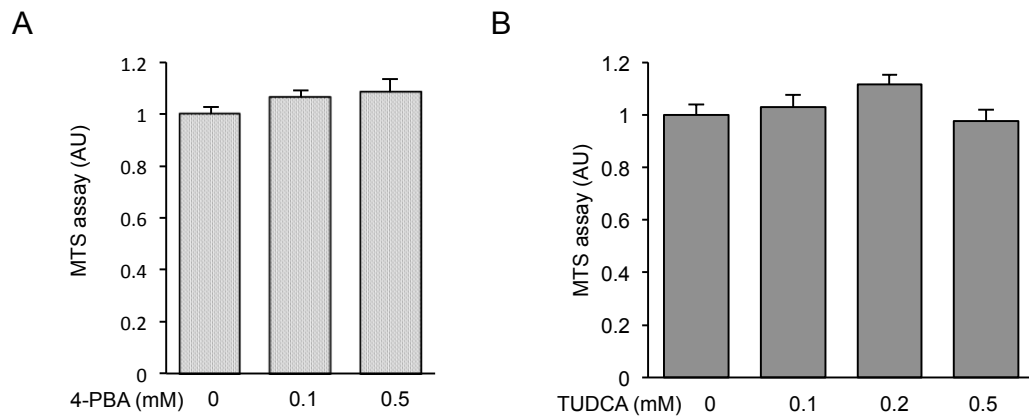

**Figure S2. Cell toxicity of 4-PBA and TUDCA in CASMC.**

**A, B.** Cell toxicity was assessed by an MTS assay in CASMC treated with 0-0.5 mM 4-PBA (A) or 0-0.5 mM TUDCA (B).

Figure S3

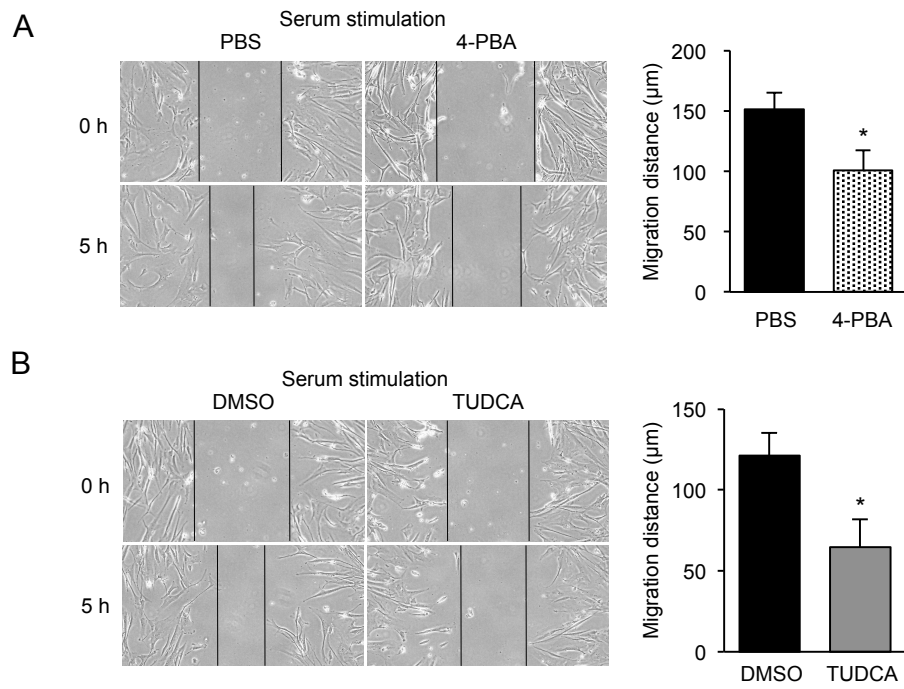

**Figure S3. Effect of chemical chaperones on cell migration induced by serum stimulation in CASMC.**

**A, B.** Cell migration was assessed by a scratch wound assay in CASMC treated with 0.5 mM 4-PBA (A) or 0.5 mM TUDCA (B) upon stimulation with 5% serum for 5 h. Photographs were taken, and migration distance was measured by ImageJ. \* $P < 0.05$ .

Figure S4

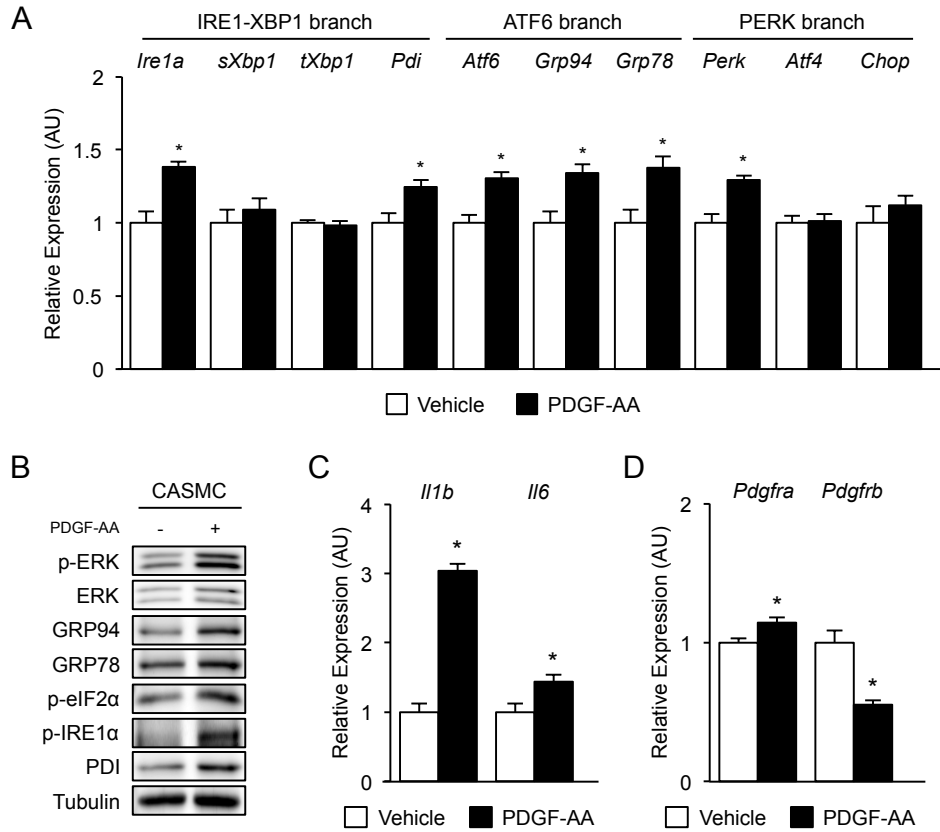

**Figure S4. Effects of PDGF-AA on UPR activation and inflammation in CASMC.**

**A, B.** Gene expression analysis (A) and Western blotting analysis (B) of ER stress markers in CASMC upon chronic stimulation with 20 ng/ml PDGF-AA for 48 h. **C, D.** Gene expression analysis of inflammatory cytokines (C) and PDGF receptors (D) in CASMC upon chronic stimulation with 20 ng/ml PDGF-AA for 48 h. \*P < 0.05 vs. Vehicle.

# Table S1

Table S1. Primers for quantitative real-time PCR for human genes

| Genes         | Species | Accession # | Forward primer |                             | Reverse primer |     |                             |     |
|---------------|---------|-------------|----------------|-----------------------------|----------------|-----|-----------------------------|-----|
| <i>18s</i>    | Human   | M10098      | 5'-            | GTAACCCGTTGAACCCATT         | -3'            | 5'- | CCATCCAATCGGTAGTAGCG        | -3' |
| <i>Atf4</i>   | Human   | NM_001675.2 | 5'-            | ATGACCGAAATGAGCTTCTCG       | -3'            | 5'- | CTGGAGAACCCATGAGGTTTG       | -3' |
| <i>Atf6</i>   | Human   | NM_007348   | 5'-            | TCAGACAGTACCAACGCTTATGC     | -3'            | 5'- | GTTGTACCACAGTAGGCTGAGA      | -3' |
| <i>Chop</i>   | Human   | NM_004083   | 5'-            | GGAGAACCAGGAAACGGAAAC       | -3'            | 5'- | TCTCCTTCATGCGTGCTTT         | -3' |
| <i>Edem</i>   | Human   | NM_014674   | 5'-            | TCCAGAAAGCAGTCAAGTTAGTG     | -3'            | 5'- | GAATCCCTGTCTTGGTGTITTTCA    | -3' |
| <i>Grp78</i>  | Human   | NM_005347   | 5'-            | CATCACGCCGTCTATGTCCG        | -3'            | 5'- | CGTCAAAGACCGTGTTCTCG        | -3' |
| <i>Grp94</i>  | Human   | NM_003299   | 5'-            | CTGGGACTGGGAACTTATGAATG     | -3'            | 5'- | TCCATATTCGTCAAACAGACCAC     | -3' |
| <i>Il6</i>    | Human   | NM_000600   | 5'-            | AAATTCGGTACATCCTCGACGG      | -3'            | 5'- | GGAAGGTTCCAGGTTGTTTTCTGC    | -3' |
| <i>Il1b</i>   | Human   | NM_000576   | 5'-            | CAC GAT GCA CCT GTA CGA TCA | -3'            | 5'- | GTT GCT CCA TAT CCT GTC CCT | -3' |
| <i>Ire1a</i>  | Human   | NM_001433   | 5'-            | TTTGGAAGTACCAGCACAGTG       | -3'            | 5'- | TGCCATCATTAGGATCTGGGA       | -3' |
| <i>Pdi</i>    | Human   | NM_000918   | 5'-            | GGTGCTGCGGAAAAGCAAC         | -3'            | 5'- | TGATCTCGGAACCTTCTGCCT       | -3' |
| <i>Pdgfra</i> | Human   | NM_006206.4 | 5'-            | AACCGTGTATAAGTCAGGGGA       | -3'            | 5'- | GCATTGTGATGCCTTTGCCTT       | -3' |
| <i>Pdgfrb</i> | Human   | NM_002609.3 | 5'-            | TCCAGCACCTTCGTTCTGAC        | -3'            | 5'- | TATTCTCCCGTGTCTAGCCCA       | -3' |
| <i>Perk</i>   | Human   | NM_004836   | 5'-            | ACGATGAGACAGAGTTGCGAC       | -3'            | 5'- | AATCCCACTGCTTTTTACCATGA     | -3' |
| <i>sXbp1</i>  | Human   | AB076384    | 5'-            | GGTCTGCTGAGTCCGCAGCAGG      | -3'            | 5'- | GGGCTTGGTATATATGTGG         | -3' |
| <i>tXbp1</i>  | Human   | NM_005080   | 5'-            | AGTAGCAGCTCAGACTGCCA        | -3'            | 5'- | CCTGGTTCTCAACTACAAGGC       | -3' |
